# Supplementary material
Source: Springer Nature journal article supplement (https://www.springermedizin.de/resource/supplementary/12955_2012_1015_MOESM2_ESM.pdf/9558834)

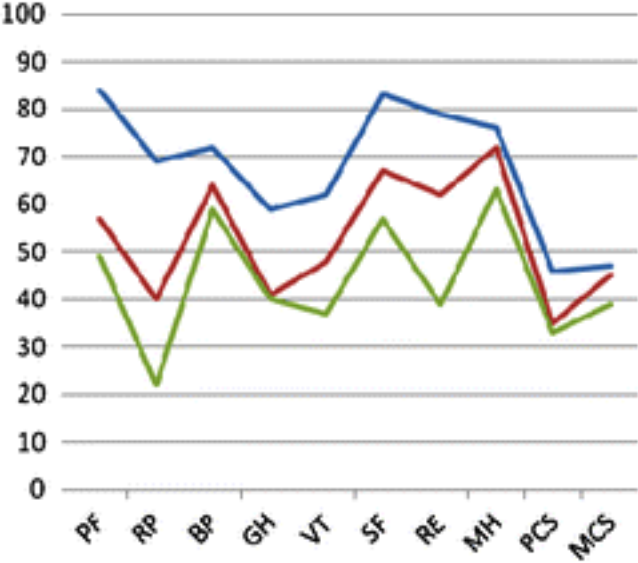

- CKD-stage 2-3 (n=54)
- CKD-stage 4 (n=87)
- CKD-stage 5 (n=394)

Supplement: MOESM2 [file 9558834]
